# Supplementary material
Source: publisher figshare collection journal article supplement (https://tandf.figshare.com/articles/dataset/_/4772287)

## Distribution of Total Patients for PT Method

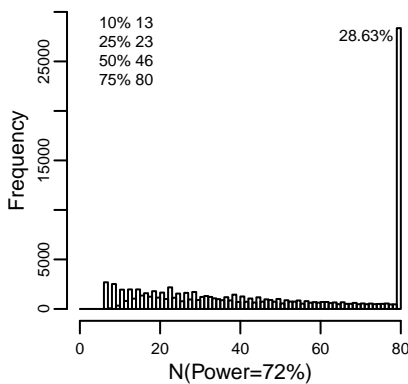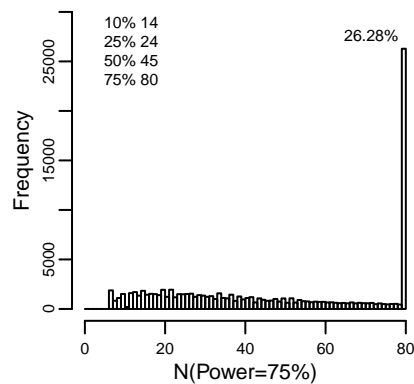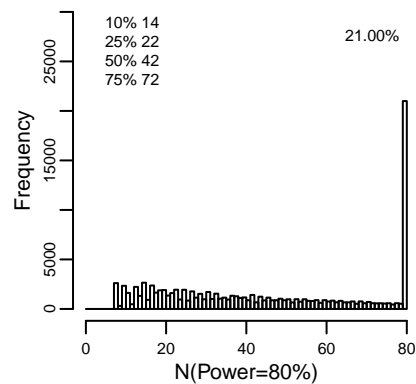

## Distribution of Total Patients for Clip Method

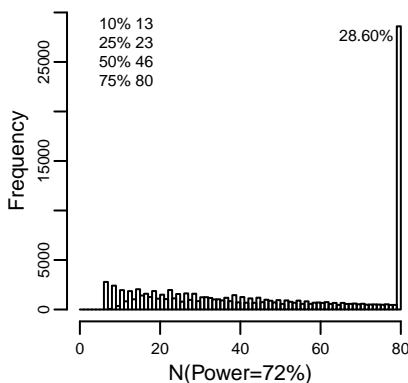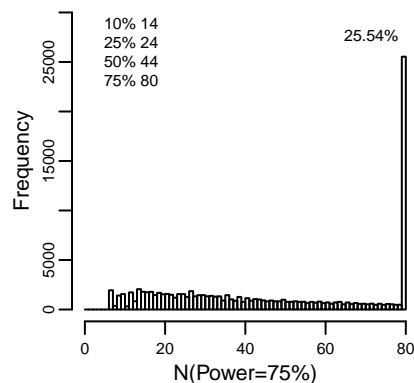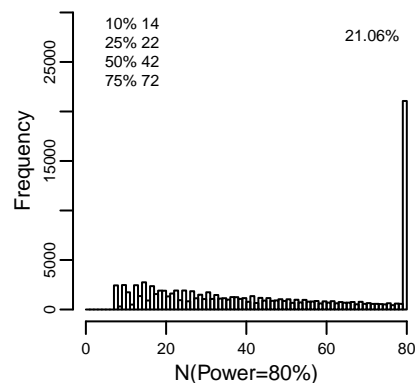

## Distribution of Total Patients for Burn-in Method

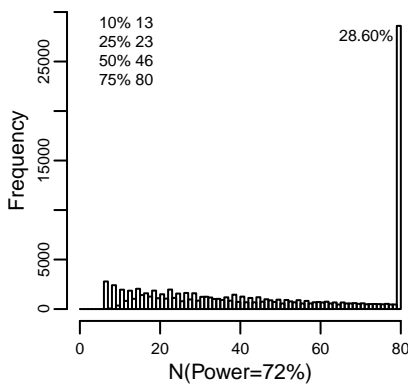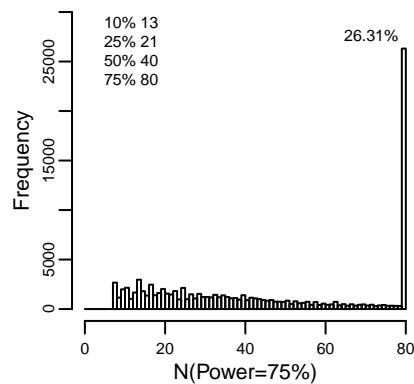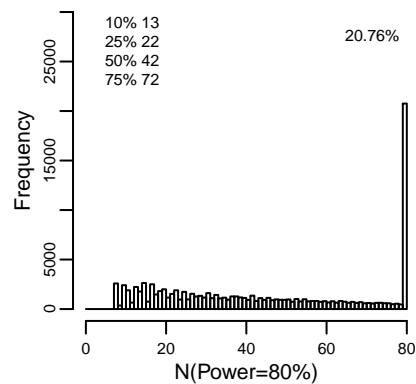

Supplement: Supplementary file 1 [file 1]
