# Supplementary material
Source: publisher figshare collection journal article supplement (https://tandf.figshare.com/articles/dataset/_/4772287)

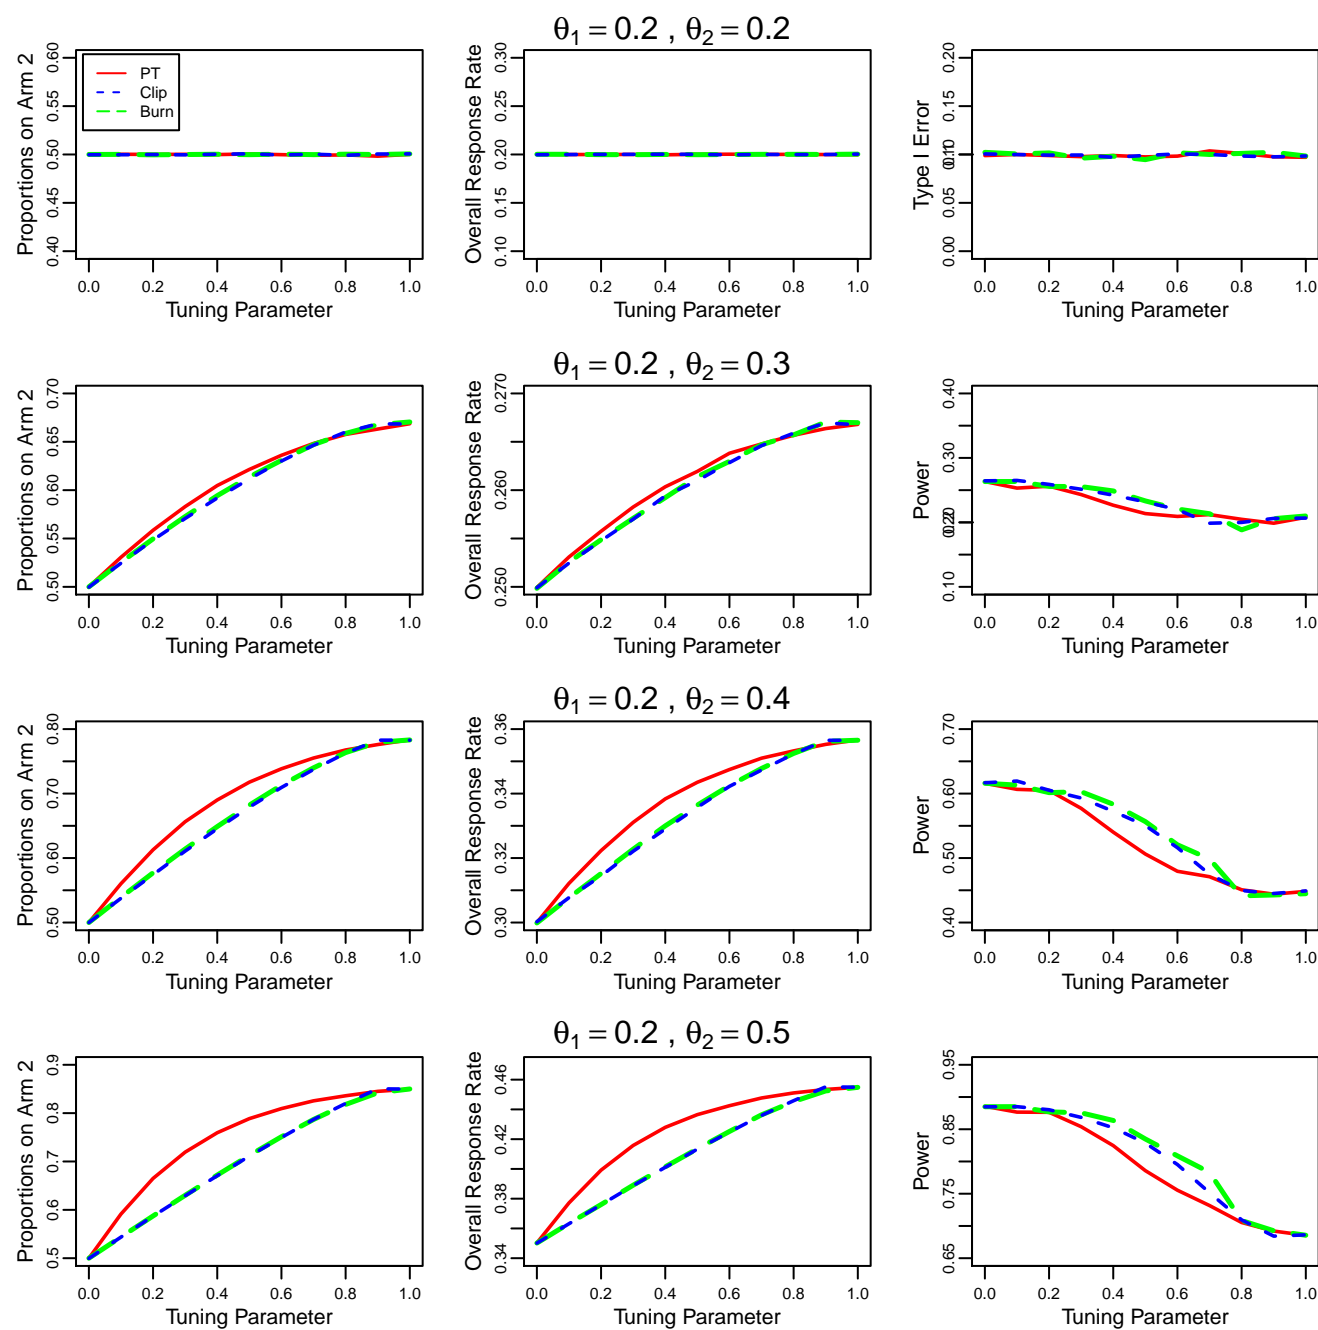

Supplement: Supplementary file 2 [file 1]

$\theta_1 = 0.2, \theta_2 = 0.2$

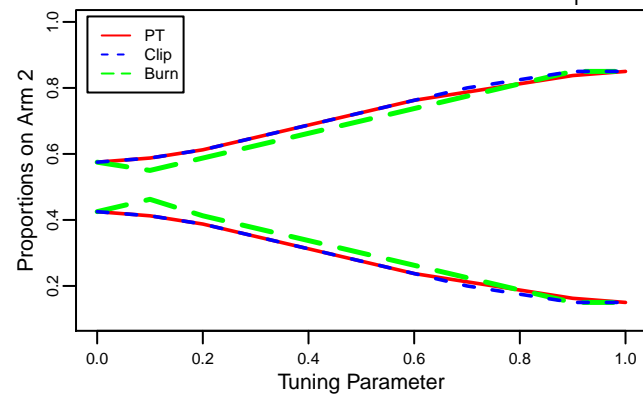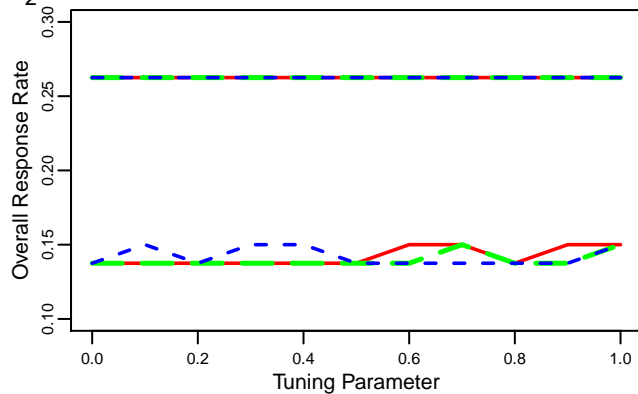

$\theta_1 = 0.2, \theta_2 = 0.4$

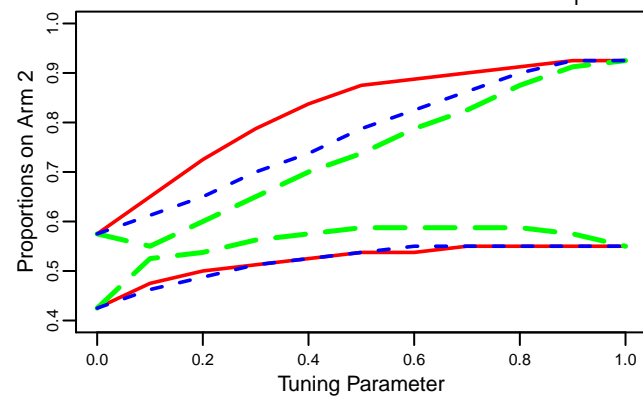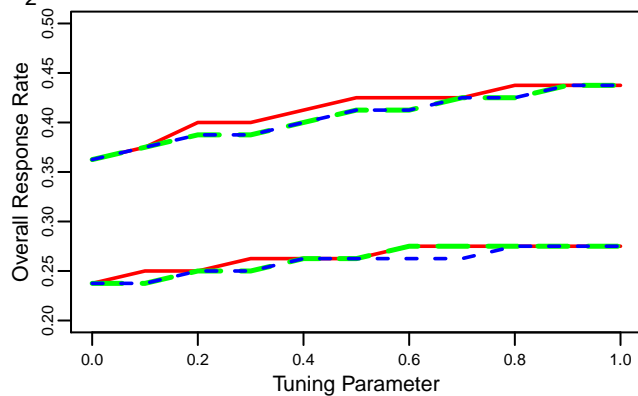

$\theta_1 = 0.2, \theta_2 = 0.5$

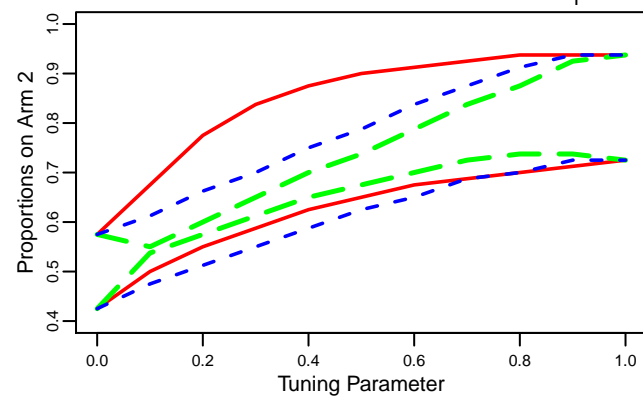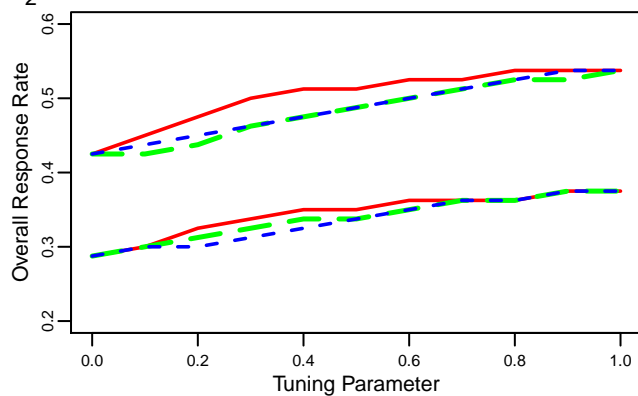

Supplement: Supplementary file 3 [file 1]

$$\theta_1 = 0.2, \theta_2 = 0.2$$

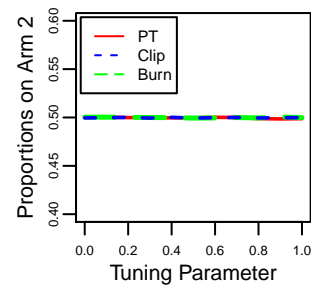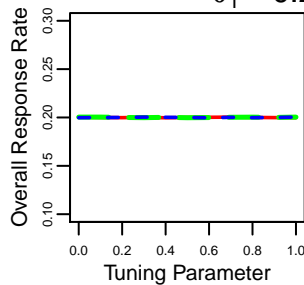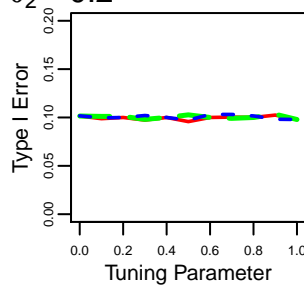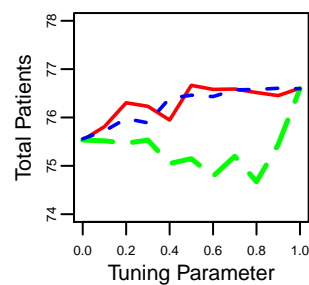

$$\theta_1 = 0.2, \theta_2 = 0.3$$

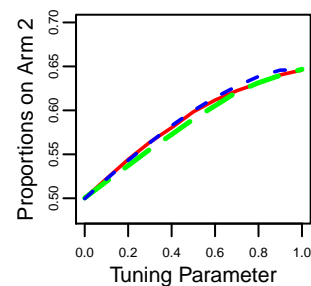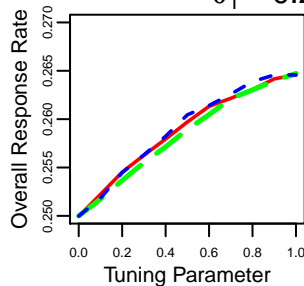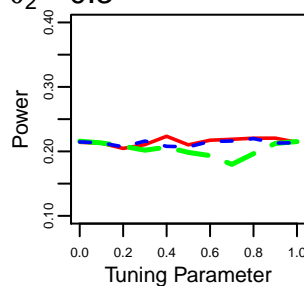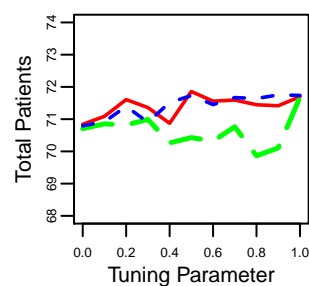

$$\theta_1 = 0.2, \theta_2 = 0.4$$

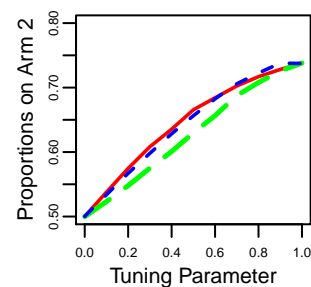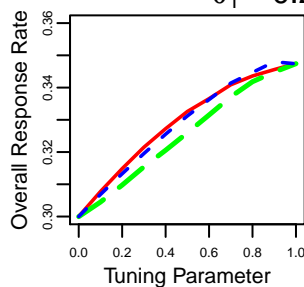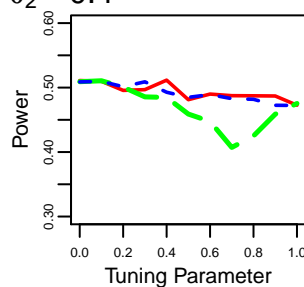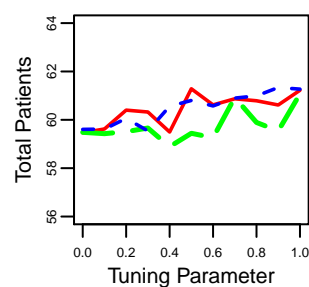

$$\theta_1 = 0.2, \theta_2 = 0.5$$

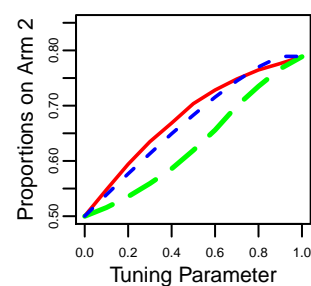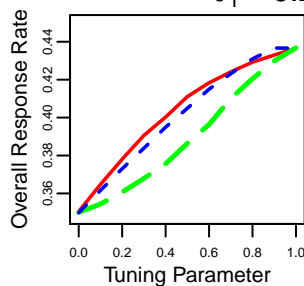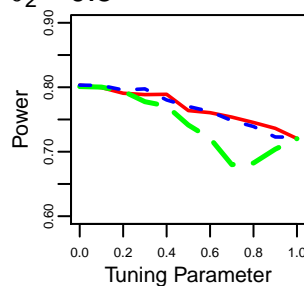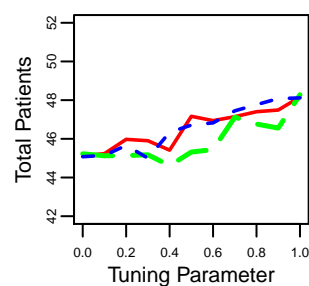

Supplement: Supplementary file 4 [file 1]

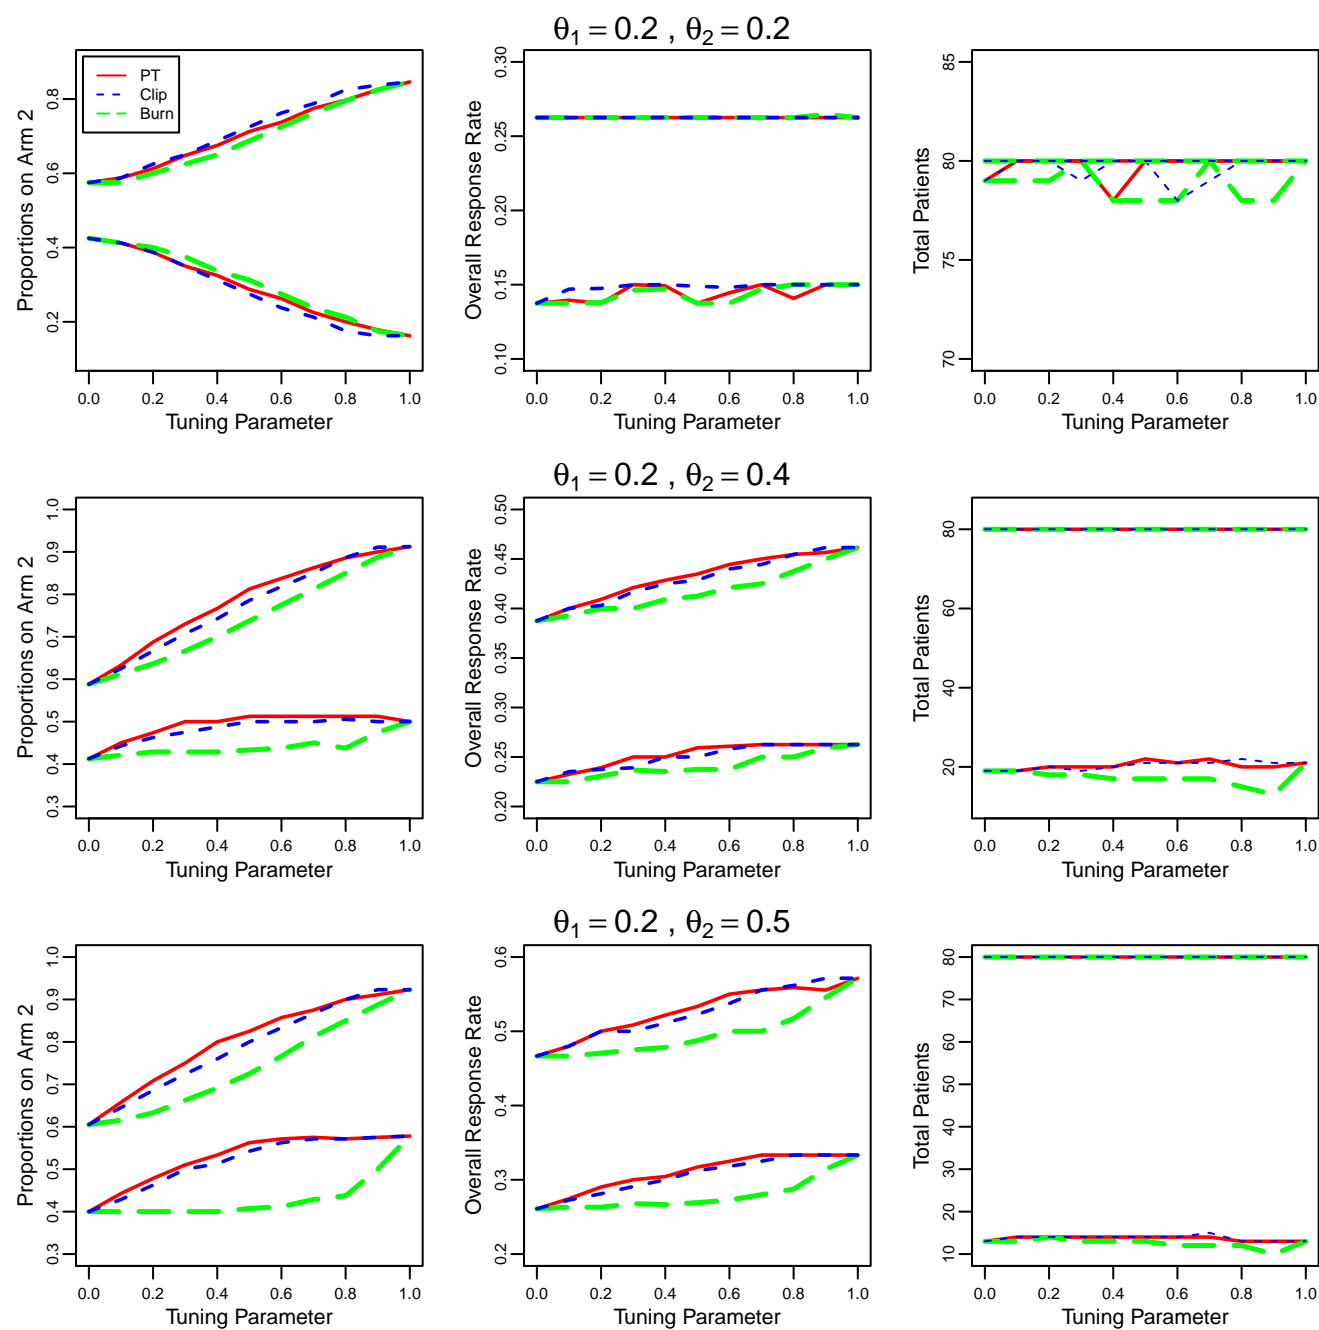

Supplement: Supplementary file 5 [file 1]
